# Supplementary material for: Highly efficient visible-light photocatalytic ethane oxidation into ethyl hydroperoxide as a radical reservoir
Source: Royal Society of Chemistry journal article supplement (doi:10.1039/d1sc00694k), 2021-01-01
Supplement: d1sc00694k1.pdf [file d1sc00694k1.pdf]

## Supplementary Information

### Highly Efficient Visible-Light Photocatalytic Ethane Oxidation into Ethyl Hydroperoxide as a Radical Reservoir

Yao Zhu,<sup>a,†</sup> Siyuan Fang,<sup>b,†</sup> Shaoqin Chen,<sup>a</sup> Youjie Tong,<sup>a</sup> Chunling Wang,<sup>a\*</sup> and Yun Hang Hu<sup>b\*</sup>

a. School of Environmental Science and Engineering, Shanghai Jiao Tong University, Shanghai 200240, China

b. Department of Materials Science and Engineering, Michigan Technological University, Houghton, Michigan 49931, USA

†These authors contributed equally.

\*Correspondence: [yunhangh@mtu.edu](mailto:yunhangh@mtu.edu), [wangchunling@sjtu.edu.cn](mailto:wangchunling@sjtu.edu.cn)

## 1. X-ray diffraction patterns

The X-ray diffraction (XRD) patterns of Au/WO<sub>3</sub> and WO<sub>3</sub> agreed well with the standard one of monoclinic WO<sub>3</sub> (JCPDS Card No. 43-1035) with lattice parameters a, b, and c equal to 7.297, 7.539, and 7.688 Å, respectively. Photo-deposition of Au did not change the crystallinity of WO<sub>3</sub>, while a weak peak at 38.337° corresponding to metallic Au appeared (JCPDS Card No. 01-1174, lattice parameter a = 4.078 Å).

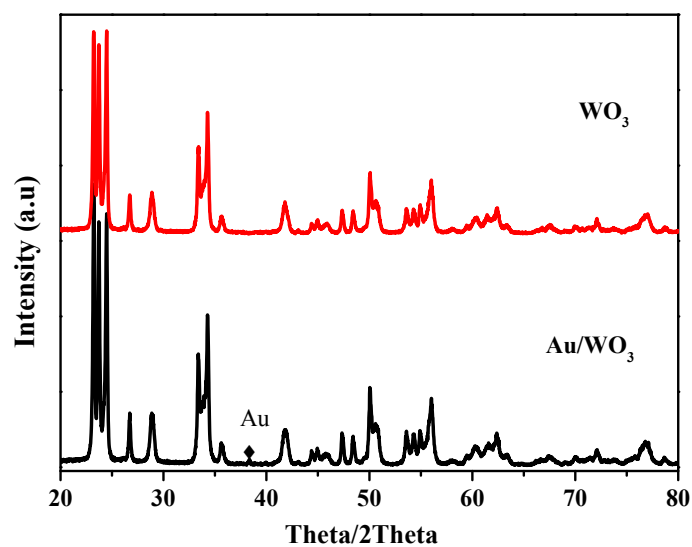

**Fig. S1** XRD patterns of Au/WO<sub>3</sub> and WO<sub>3</sub>.

## 2. Size distribution of Au nanoparticles

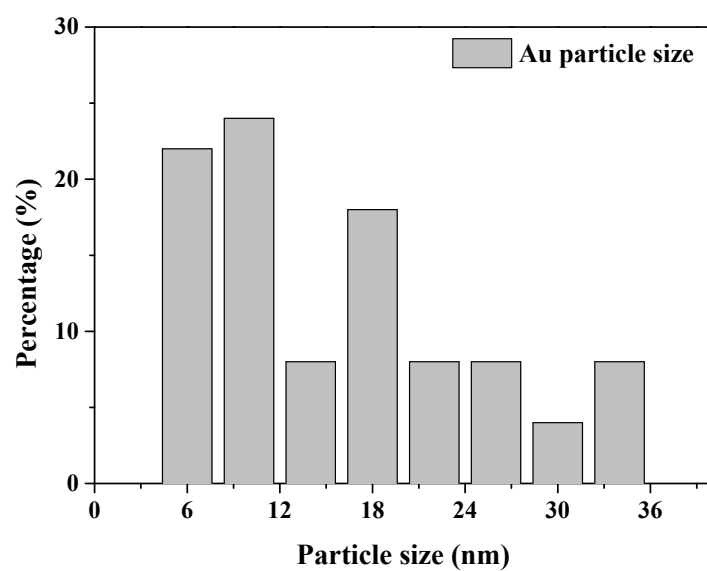

**Fig. S2** Size distribution of Au nanoparticles in Au/WO<sub>3</sub> based on the TEM images.

### 3. N<sub>2</sub> adsorption-desorption isotherm

Approximate type V isotherms were obtained for Au/WO<sub>3</sub> and WO<sub>3</sub>. The Brunauer–Emmett–Teller (BET) surface area of Au/WO<sub>3</sub> and WO<sub>3</sub> were 4.5055 and 4.1361 m<sup>2</sup>/g, respectively. The Barrett–Joyner–Halenda (BJH) average pore diameter and volume of Au/WO<sub>3</sub> were 261.572 Å and 0.036819 cm<sup>3</sup>/g, similar to those of WO<sub>3</sub> (263.428 Å and 0.037236 cm<sup>3</sup>/g).

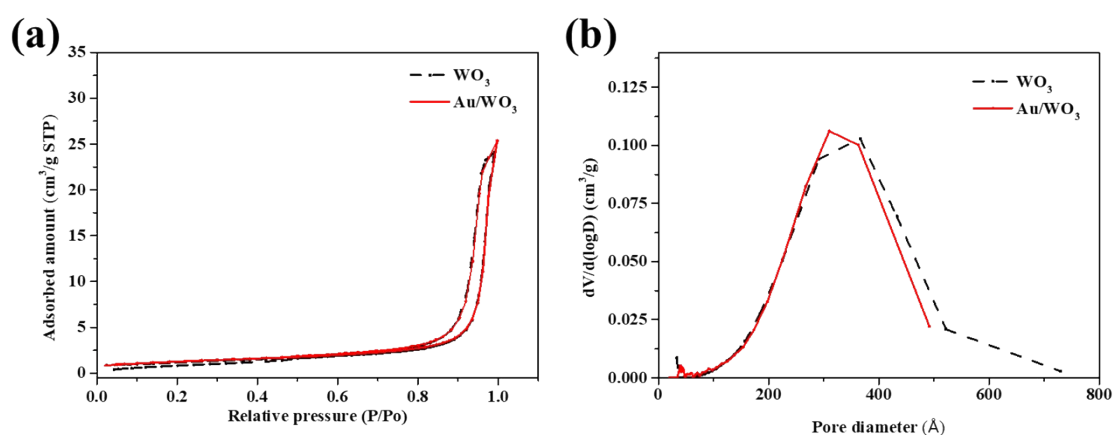

**Fig. S3** Results of N<sub>2</sub> adsorption-desorption measurement of Au/WO<sub>3</sub> and WO<sub>3</sub>. (a) N<sub>2</sub> adsorption-desorption curve. (b) Pore distribution curve.

#### 4. X-ray photoelectron spectra

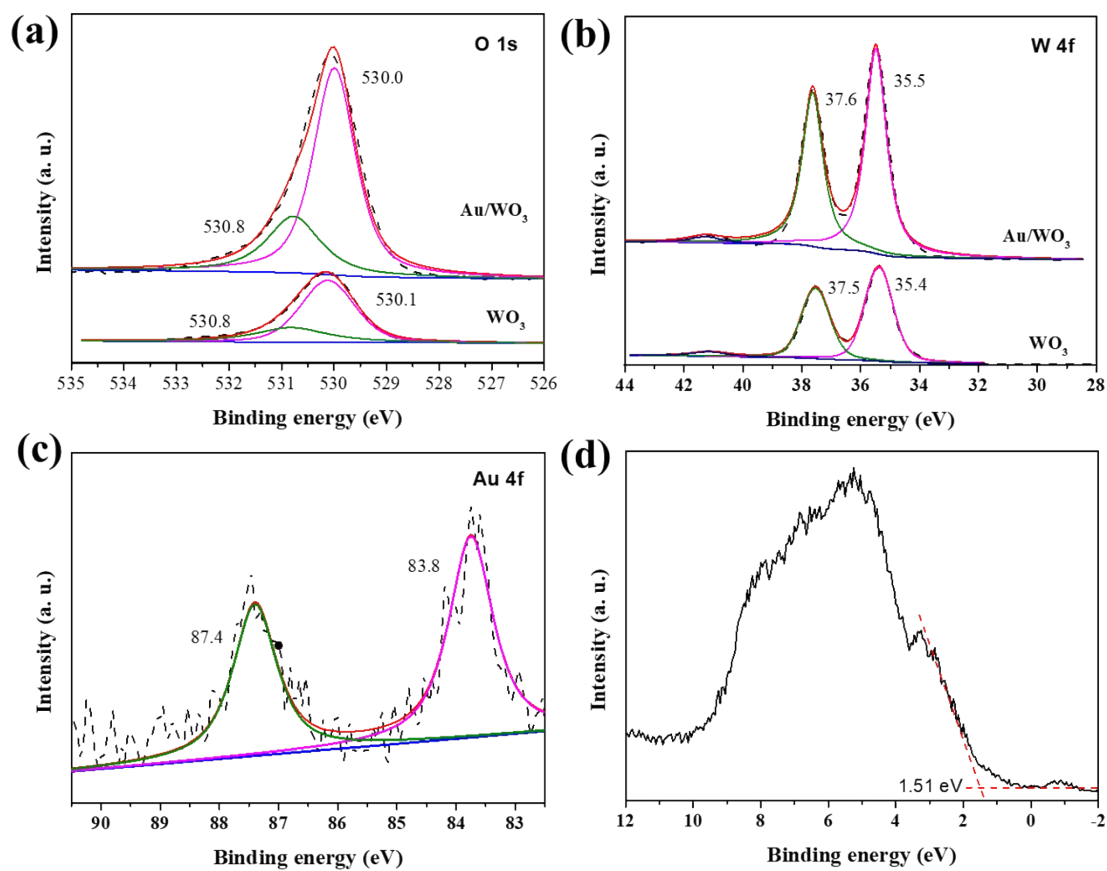

**Fig. S4** XPS spectra of Au/WO<sub>3</sub> and WO<sub>3</sub>. (a) O 1s XPS spectra of Au/WO<sub>3</sub> and WO<sub>3</sub>. (b) W 4f XPS spectra of Au/WO<sub>3</sub> and WO<sub>3</sub>. (c) Au 4f XPS spectrum of Au/WO<sub>3</sub>. (d) valence-band XPS spectrum of Au/WO<sub>3</sub>.

## 5. Mott-Schottky plot

Mott-Schottky plots for Au/WO<sub>3</sub> were recorded at 500, 1000, 1500, and 2000 Hz in the dark, from which the Fermi level was demonstrated as 0.71 V (vs NHE).

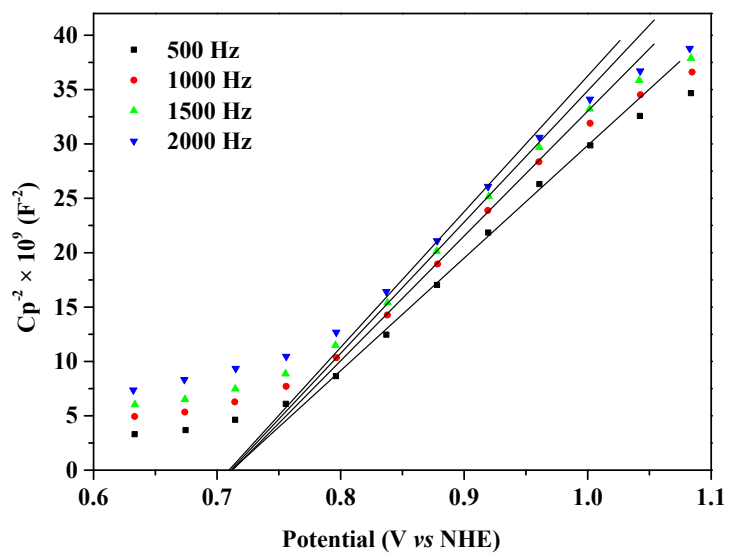

Fig. S5 Mott-Schottky plots of Au/WO<sub>3</sub>.

## 6. Schematic reactor

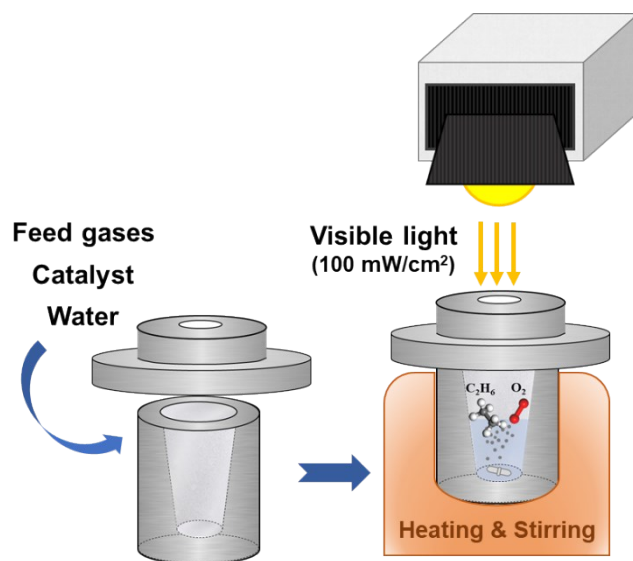

**Fig. S6** Scheme of the reactor for visible-light driven photo-oxidation of ethane.

## 7. $^1\text{H}$ nuclear magnetic resonance spectrum

$^1\text{H}$  NMR was conducted to identify the liquid products in two-hour photocatalytic reaction at  $100\text{ }^\circ\text{C}$ . The signals of  $\text{CH}_3\text{CH}_2\text{OOH}$ ,  $\text{CH}_3\text{CH}_2\text{OH}$ ,  $\text{CH}_3\text{CHO}$ ,  $\text{CH}_3\text{CH}(\text{OH})_2$ ,  $\text{CH}_3\text{COOH}$ ,  $\text{CH}_3\text{OOH}$ ,  $\text{HOCH}_2\text{OOH}$ ,  $\text{HCOOH}$ , and dissolved  $\text{C}_2\text{H}_6$  were observed, as referred to previous reports.<sup>1-3</sup> The chemical shifts of  $\text{CH}_3\text{CH}_2\text{OOH}$  were further confirmed by DFT calculations ( $-\text{CH}_3$  at 1.21 ppm,  $-\text{CH}_2-$  at 4.18 ppm), in comparison with those of  $\text{CH}_3\text{CH}_2\text{OH}$  ( $-\text{CH}_3$  at 1.20 ppm,  $-\text{CH}_2-$  at 3.89 ppm).

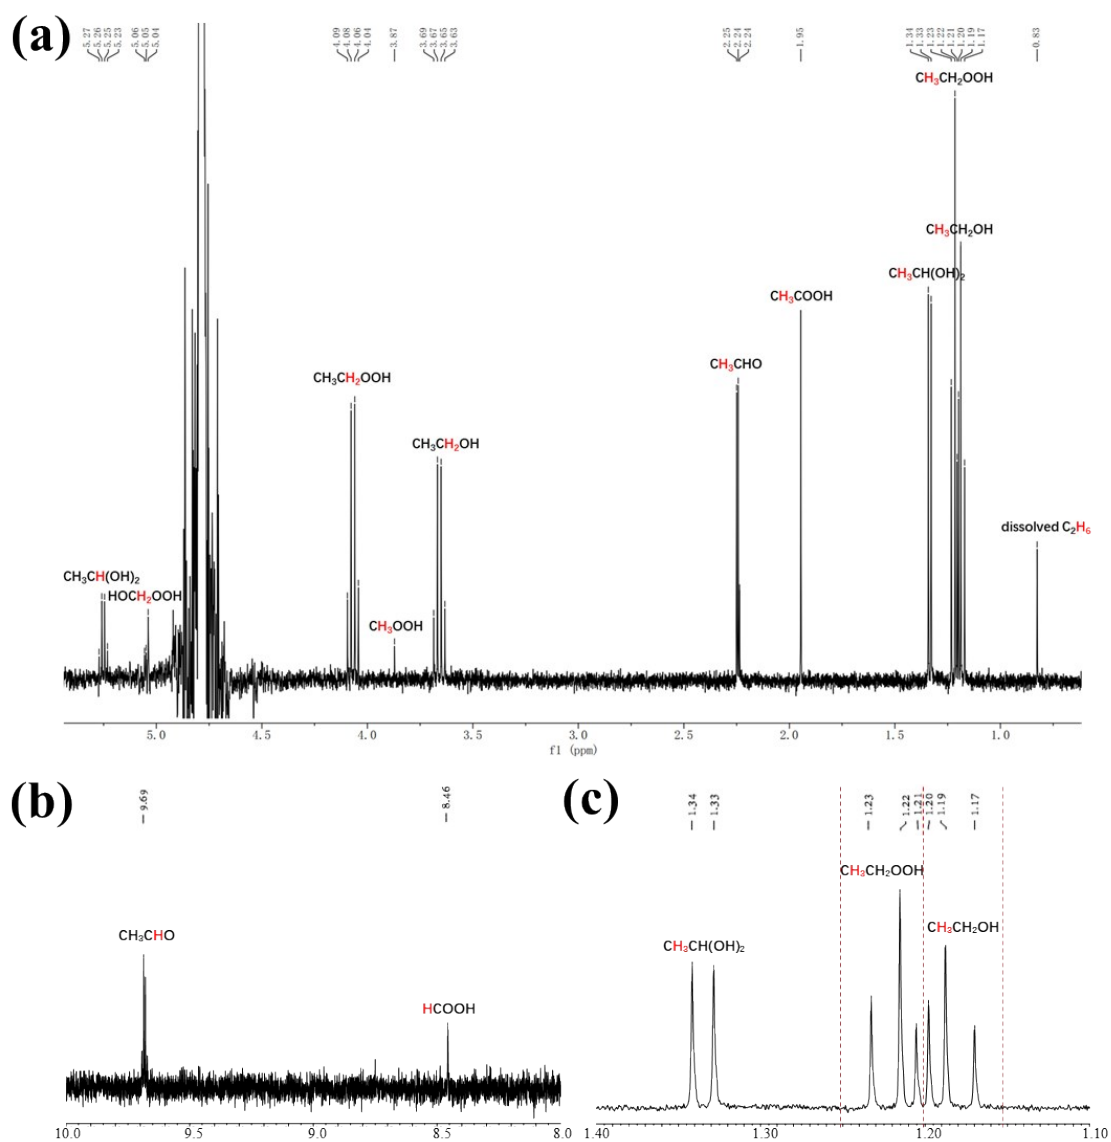

**Fig. S7**  $^1\text{H}$  nuclear magnetic resonance spectra of the liquid products.



## 8. Gas chromatography-mass spectrometry results

The liquid products generated in two-hour photocatalytic reaction over Au/WO<sub>3</sub> at 100 °C in the presence of general or isotope-labeled reactants (O<sup>18</sup><sub>2</sub>, H<sub>2</sub>O<sup>18</sup>, or D<sub>2</sub>O) were analyzed by GC-MS. All the C2 products (CH<sub>3</sub>CH<sub>2</sub>OOH, CH<sub>3</sub>CH<sub>2</sub>OH, CH<sub>3</sub>CHO, and CH<sub>3</sub>COOH) were detected whose GC-MS spectra agree well the standard ones in the database while C1 products could not be clearly identified due to their tiny amounts.

Moreover, it should be noted that there should be only two origins of oxygen in the products, namely, O<sub>2</sub> and H<sub>2</sub>O. The result of the O<sup>18</sup><sub>2</sub> experiment was analyzed combined with that of the H<sub>2</sub>O<sup>18</sup> experiment since there could be some experimental errors due to the impurity of the isotope-labelled reactants and the influence of air.

When using  $O^{18}_2$  as the reactant,  $CH_3CH_2O^{18}O^{18}H$  was detected (Fig. S8b) while the GC-MS spectrum with  $H_2O^{18}$  (Fig. S8c) is the same as that with the general reactants (Fig. S8a). This indicates that O in  $CH_3CH_2OOH$  originated from  $O_2$  and the weak  $m/z$  signal at 62 in Fig. S8b is due to the experimental error. In addition,  $CH_3CH_2OOD$  was detected when using  $D_2O$  as the reactant (Fig. S8d).

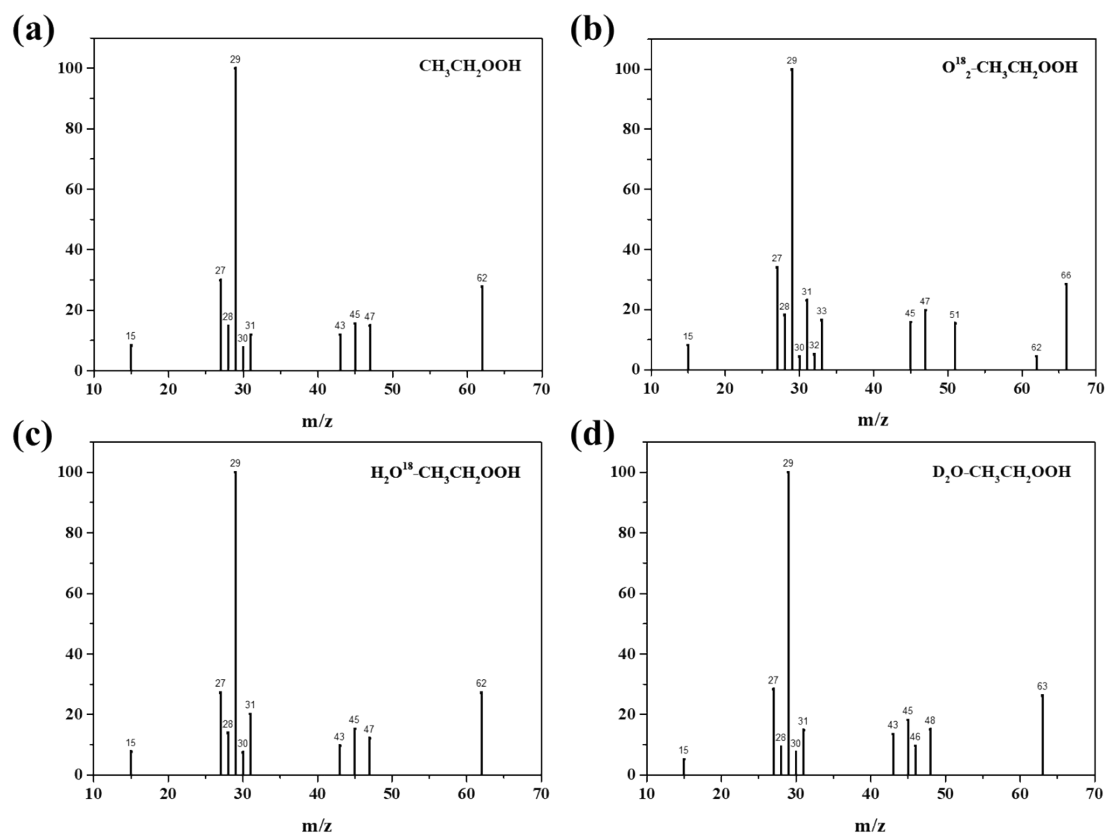

**Fig. S8** GC-MS spectra for  $C_2H_5OOH$ .

Similar to the above discussion on  $\text{CH}_3\text{CH}_2\text{OOH}$ ,  $\text{CH}_3\text{CH}_2\text{O}^{18}\text{H}$  was detected with  $\text{O}^{18}_2$  as the reactant (Fig. S9b) while the GC-MS spectrum with  $\text{H}_2\text{O}^{18}$  (Fig. S9c) is identical to that obtained using the general reactants (Fig. S9a). Therefore, we believe O in  $\text{CH}_3\text{CH}_2\text{OH}$  came from  $\text{O}_2$  rather than  $\text{H}_2\text{O}$ . Moreover, D in  $\text{D}_2\text{O}$  was not detected in the produced  $\text{CH}_3\text{CH}_2\text{OH}$  (Fig. S9d).

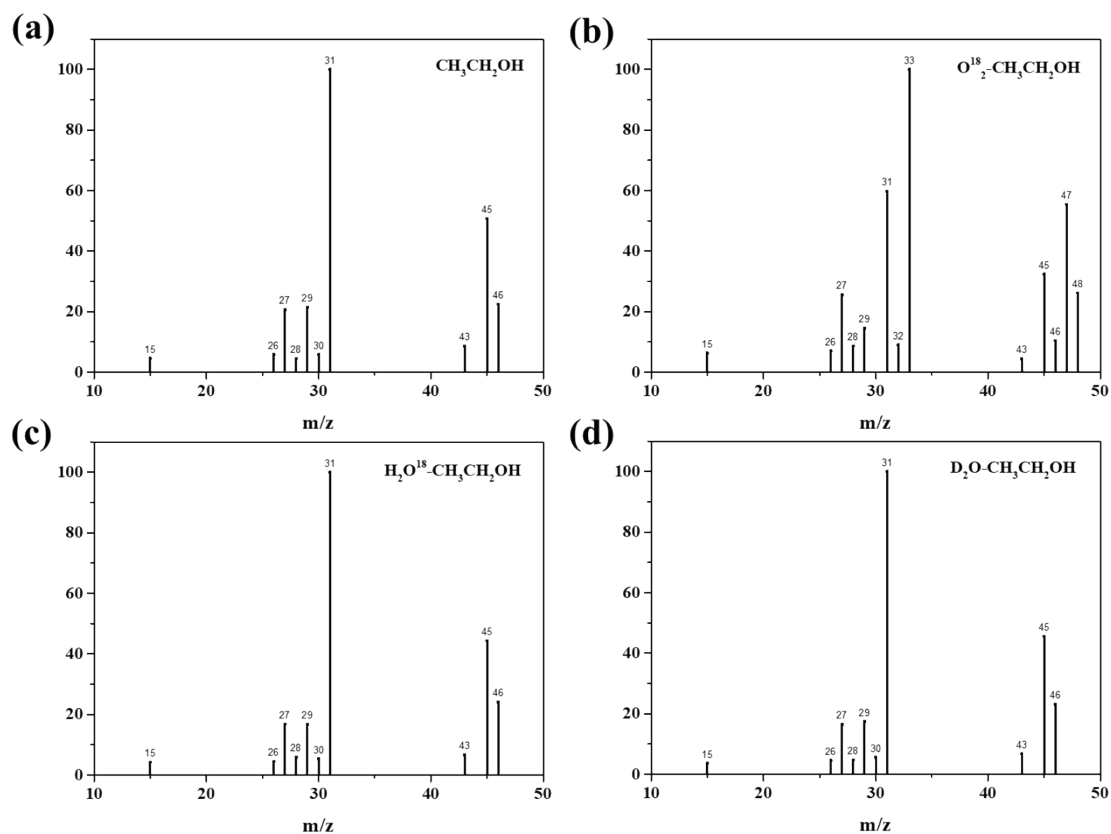

**Fig. S9** GC-MS spectra for  $\text{CH}_3\text{CH}_2\text{OH}$ .

From the GC-MS spectra of the  $O^{18}_2$  and  $H_2O^{18}$  experiments (Fig. S10 b and c), it could be seen that both  $O_2$  and  $H_2O$  contributed to O atoms in  $CH_3CHO$ . In contrast, H in  $H_2O$  made no contribution to the generation of  $CH_3CHO$  due to the identical spectra obtained with  $H_2O$  and  $D_2O$  (Fig. S10 a and d).

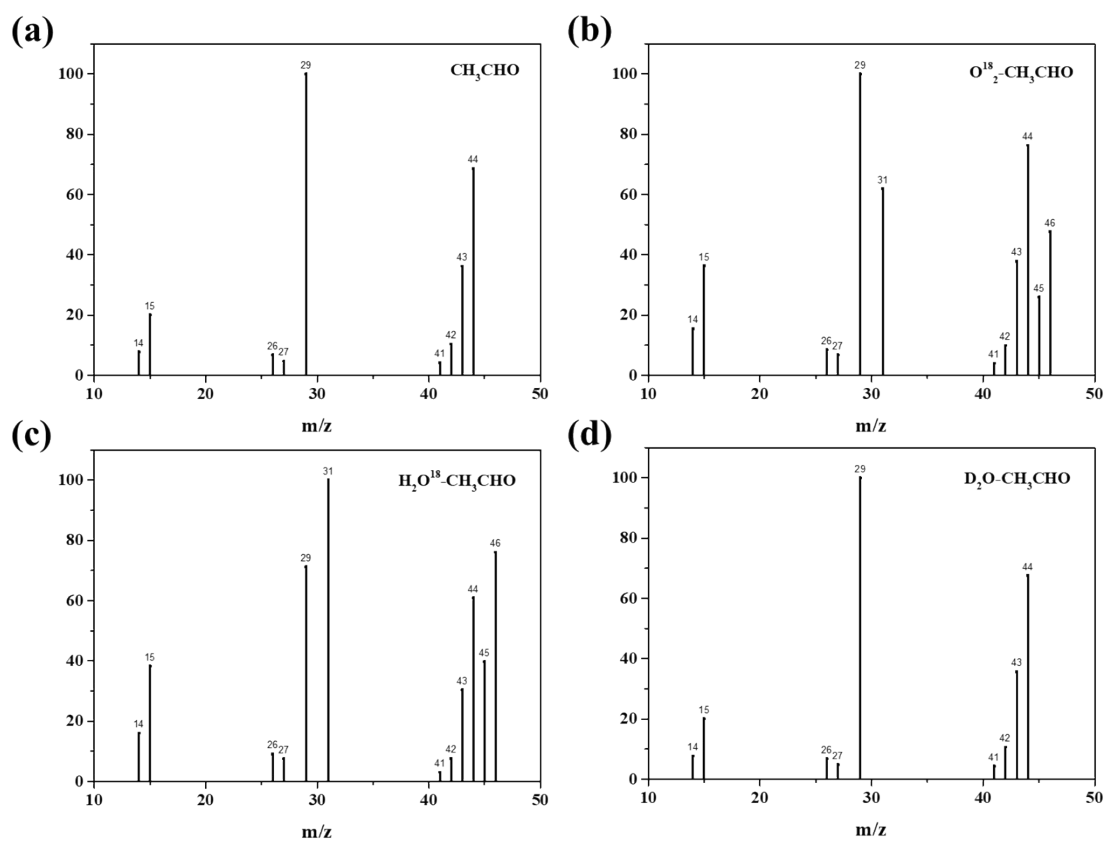

**Fig. S10** GC-MS spectra for  $CH_3CHO$ .

The GC-MS spectra of the  $O^{18}_2$  and  $H_2O^{18}$  experiments (Fig. S11 b and c) were quite similar, indicating the co-existence of  $CH_3COOH$ ,  $CH_3CO^{18}O^{18}H$ , and  $CH_3CO^{18}OH$  (or  $CH_3COO^{18}H$ ). Thus, O atoms in  $CH_3COOH$  were derived from either  $O_2$  or  $H_2O$ . Additionally, as revealed in Fig. S11d, H atom in the carboxy group partially originated from  $H_2O$ .

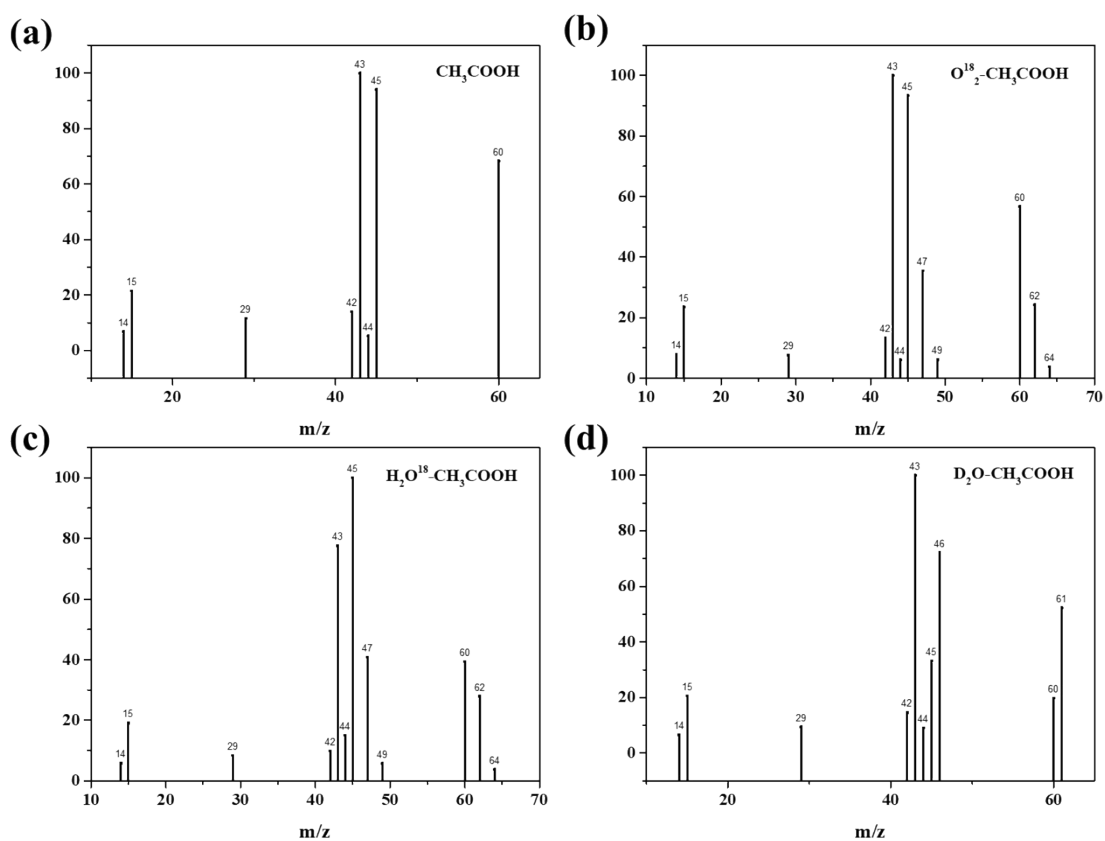

**Fig. S11** GC-MS spectra for  $CH_3COOH$ .

## 9. Comparison of activities over various catalysts

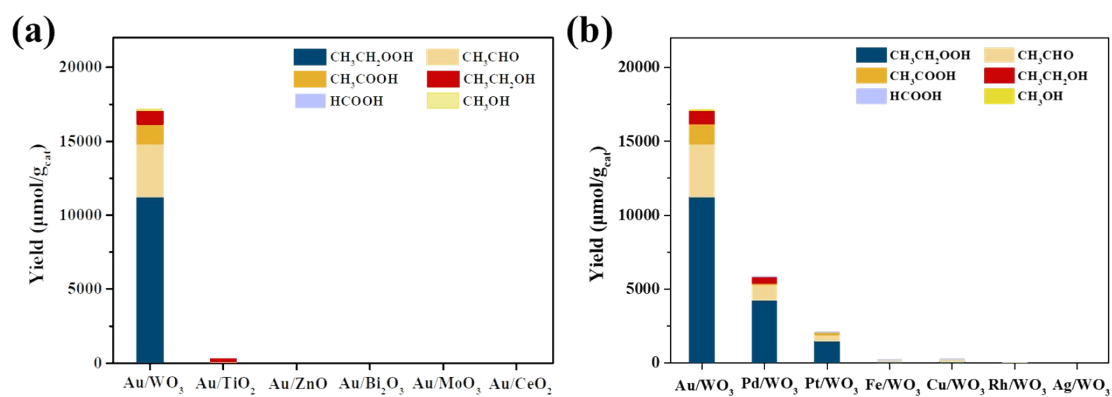

**Fig. S12** Visible-light driven photocatalytic ethane oxidation over various catalysts at 100 °C (reacting for 2 h in 20 mL water). (a) Photocatalytic ethane oxidation over Au-loaded catalysts. (b) Photocatalytic ethane oxidation over WO<sub>3</sub> catalysts loaded with different metals.

## 10. The effect of Au loading amount on the catalytic activity

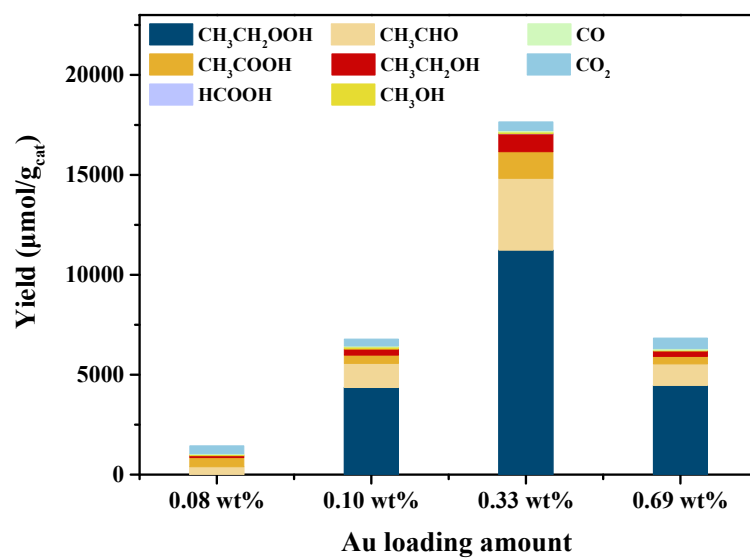

**Fig. S13** Visible-light driven photocatalytic ethane oxidation over Au/ $\text{WO}_3$  catalysts with various Au loading amounts (reacting for 2 h in 20 mL water at 100 °C).

## References

1. Jin, R., Peng, M., Li, A., Deng, Y., Jia, Z., Huang, F., Ling, Y., Yang, F., Fu, H., Xie, J., et al. (2019). Low Temperature Oxidation of Ethane to Oxygenates by Oxygen over Iridium-Cluster Catalysts. *J. Am. Chem. Soc.* *141*, 18921-18925.
2. Forde, M. M., Armstrong, R. D., Hammond, C., He, Q., Jenkins, R. L., Kondrat, S. A., Dimitratos, N., Lopez-Sanchez, J. A., Taylor, S. H., Willock, D., et al. (2013). Partial Oxidation of Ethane to Oxygenates Using Fe- and Cu-Containing ZSM-5. *J. Am. Chem. Soc.* *135*, 11087-11099.
3. Wang, S., Li, H., He, M., Cui, X., Hua, L., Li, H., Xiao, J., Yu, L., Rajan, N. P., Xie, Z., et al. (2019). Room-temperature conversion of ethane and the mechanism understanding over single iron atoms confined in graphene. *J. Energ. Chem.* *36*, 47-50.
